# Supplementary material
Source: PubMed Central journal article supplement (PMC5485832)

Perivascular Adipose Tissue Transplant Promotes Carotid Atherosclerosis

+ WT PVAT

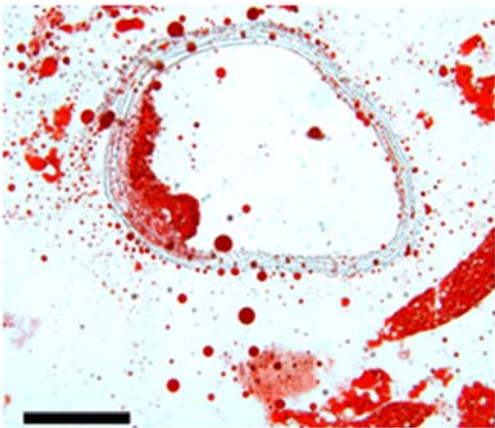

+ LRP1-null PVAT

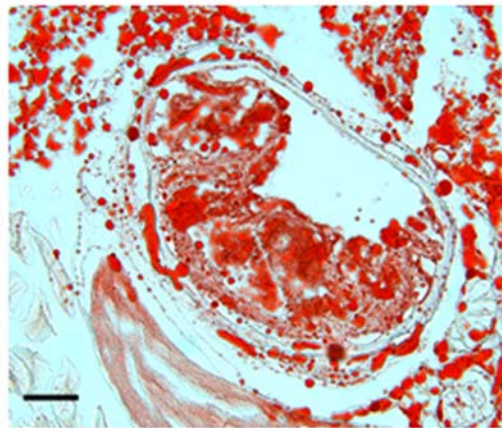

LRP1 Deficiency Increases PVAT Inflammation

+ WT PVAT

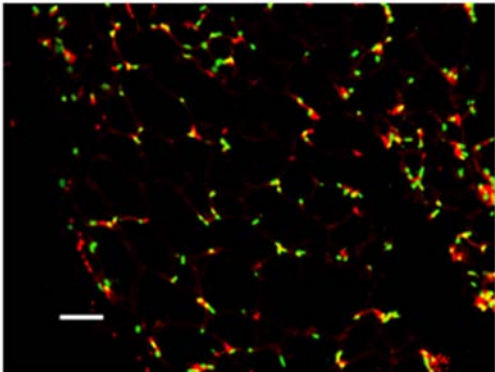

+ LRP1-null PVAT

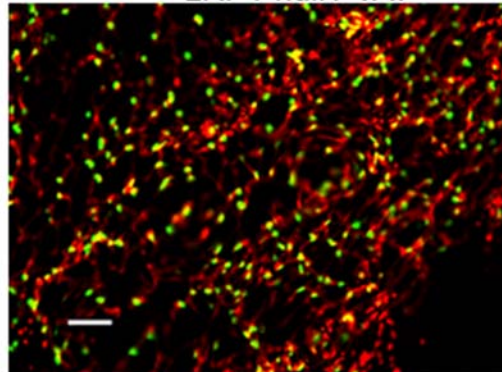

Supplement: NIHMS870310-supplement-Graphic_Abstract.pdf [file NIHMS870310-supplement-Graphic_Abstract.pdf]
