# Supplementary material
Source: PubMed Central journal article supplement (PMC5485832)
Supplement: NIHMS870310-supplement-Supplemental_online_data.pdf [file NIHMS870310-supplement-Supplemental_online_data.pdf]

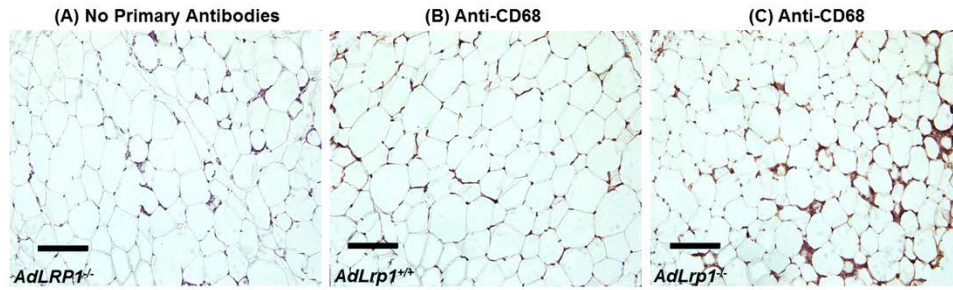

**Figure I. Immunohistochemistry for CD68 cells in periaortic adipose tissues of Western diet-fed *adLrp1<sup>+/+</sup>* and *adLrp1<sup>-/-</sup>* mice.** Periaortic adipose tissues were harvested from *adLrp1<sup>+/+</sup>* and *adLrp1<sup>-/-</sup>* mice after 16 weeks of feeding the Western diet. The adipose tissues were processed for immunohistochemistry staining with or without anti-CD68 antibodies (1:200 dilution). Immunoreactivity was visualized by incubation with 1:200 dilution of anti-mouse IgG followed by ABC reagent at 1:50 dilution (Vectastain ABC kit, Vector labs). The sections were also counterstained with hematoxylin and eosin stains. CD68+ cells were identified based on brown staining while nuclei stain appears in blue color. **(A)** Negative control of H&E and secondary antibody immunohistochemistry in the absence of anti-CD68. **(B,C)** Representative immunohistochemistry for anti-CD68 cells in adipose tissues from *adLrp1<sup>+/+</sup>* and *adLrp1<sup>-/-</sup>* mice, respectively. Scale bars = 100  $\mu$ m.

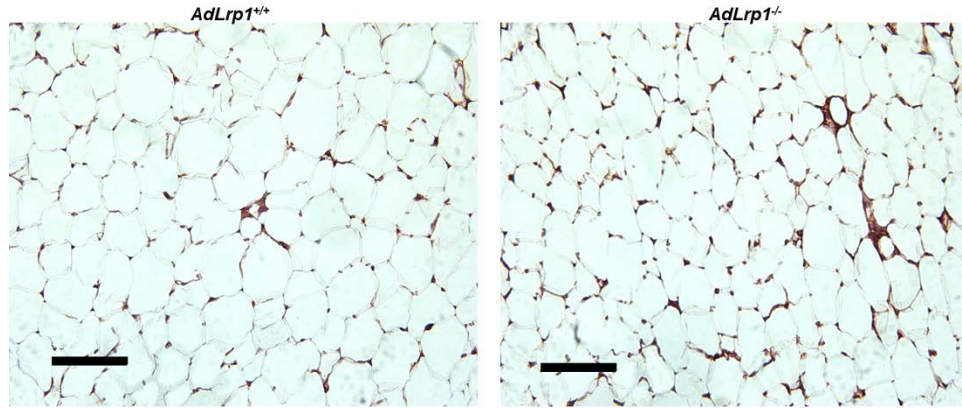

**Figure II. Immunohistochemistry of CD68+ cells in the transplanted adipose tissues.** PVAT from chow-fed *adLrp1<sup>+/+</sup>* and *adLrp1<sup>-/-</sup>* mice were transplanted to surrounding areas of left carotid arteries in *Ldlr<sup>-/-</sup>* mice. The transplanted PVAT were harvested from the animals after 8 weeks of feeding the Western diet. Immunohistochemistry detection of CD68+ cells were performed as described in legend to Figure I. Scale bars = 100  $\mu$ m.

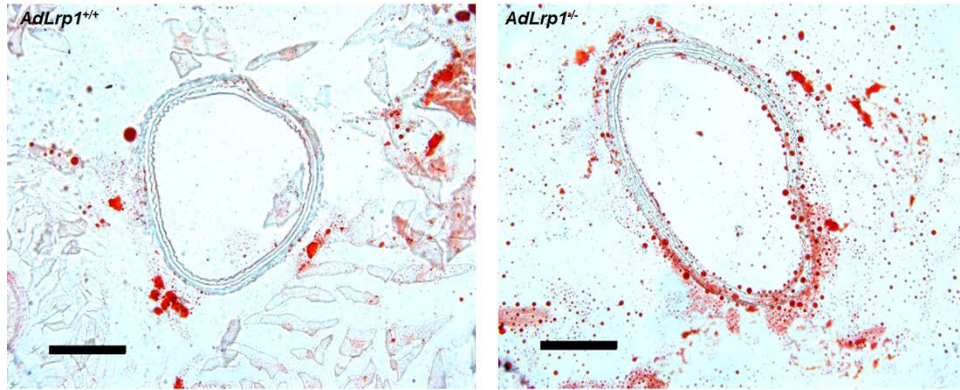

**Figure III. Absence of atherosclerotic lesions in contralateral right carotid arteries from *adLrp1*<sup>+/+</sup> and *adLrp1*<sup>-/-</sup> mice after PVAT transplant to the left carotid arteries.** PVAT from chow-fed *adLrp1*<sup>+/+</sup> and *adLrp1*<sup>-/-</sup> mice were transplanted to surrounding areas of left carotid arteries in *Ldlr*<sup>-/-</sup> mice. Atherosclerosis in the carotid arteries were examined after 8 weeks of Western diet feeding. Images showed absence of atherosclerotic lesions in the contralateral right carotid arteries without surrounding PVAT. Scale bars = 100  $\mu$ m.
